# Supplementary material for: Modelling firn thickness evolution during the last deglaciation: constraints on sensitivity to temperature and impurities
Source: Copernicus journal article supplement (doi:10.5194/cp-13-833-2017), 2017-07-13
Supplement: Supplementary file 1 [file cp-13-833-2017-supplement.zip]

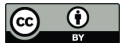

## *Supplement of*

# **Modelling firn thickness evolution during the last deglaciation: constraints on sensitivity to temperature and impurities**

**Camille Bréant et al.**

*Correspondence to:* Camille Bréant ([camille.breant@univ-grenoble-alpes.fr](mailto:camille.breant@univ-grenoble-alpes.fr))

- [cp-13-833-2017-supplement-title-page.pdf](#)
- DATA-DENS-POLYN-FIT
  - .Rhistory
  - dens\_b29\_fit.txt
  - dens\_b32\_fit.txt
  - dens\_byrd\_fit.txt
  - dens\_d47\_fit.txt
  - dens\_de08\_fit.txt
  - dens\_dome\_a\_fit.txt
  - dens\_dome\_c\_fit.txt
  - dens\_dye3\_fit.txt
  - dens\_edml\_fit.txt
  - dens\_grip\_fit.txt
  - dens\_km105\_fit.txt
  - dens\_km200\_fit.txt
  - dens\_mizuho\_fit.txt
  - dens\_neem\_fit.txt
  - dens\_ngrip\_fit.txt
  - dens\_pole\_sud\_fit.txt
  - dens\_siple\_fit.txt
  - dens\_siteA\_crete\_fit.txt
  - dens\_site\_2\_fit.txt
  - dens\_talos\_fit.txt
  - dens\_vostok\_fit.txt

- dens\_wais\_fit.txt
  - read\_me.txt
- Supplementary\_material\_paper\_densification\_revised\_version\_mai\_2017.pdf

The copyright of individual parts of the supplement might differ from the CC BY 3.0 License.
